# Supplementary material
Source: publisher site journal article supplement (https://www.dovepress.com/article/521565)
Supplement: Supplementary file 1 [file 521565%20Supplementary%20Material.docx]

**Supplementary Table 1. 15 differentially expressed rhythm genes**

| *PRKG2* | *SLC6A4* | *CPT1A* | *PPARGC1A* | *SIK1* | *DDC* | *USP2* | *IL6* |
| --- | --- | --- | --- | --- | --- | --- | --- |
| *EGR3* | *EGR1* | *PROK2* | *PPARG* | *NOS2* | *NAMPT* | *PTGDS* |  |

**Supplementary Table 2. Details of the genes obtained from three machine learning methods**

| method | gene | | | | | | |
| --- | --- | --- | --- | --- | --- | --- | --- |
| Lasso | *PRKG2* | *SLC6A4* | *CPT1A* | *PPARGC1A* | *SIK1* | *NOS2* |  |
| SVM | *PPARGC1A* | *SLC6A4* | *CPT1A* | *SIK1* | *USP2* | *PPARG* | *PROK2* |
| *PTGDS* | *PRKG2* | *DDC* | *EGR1* | *EGR3* | *NOS2* |  |
| RF | *SLC6A4* | *PRKG2* | *CPT1A* | *PPARGC1A* | *PPARG* |  |  |

**
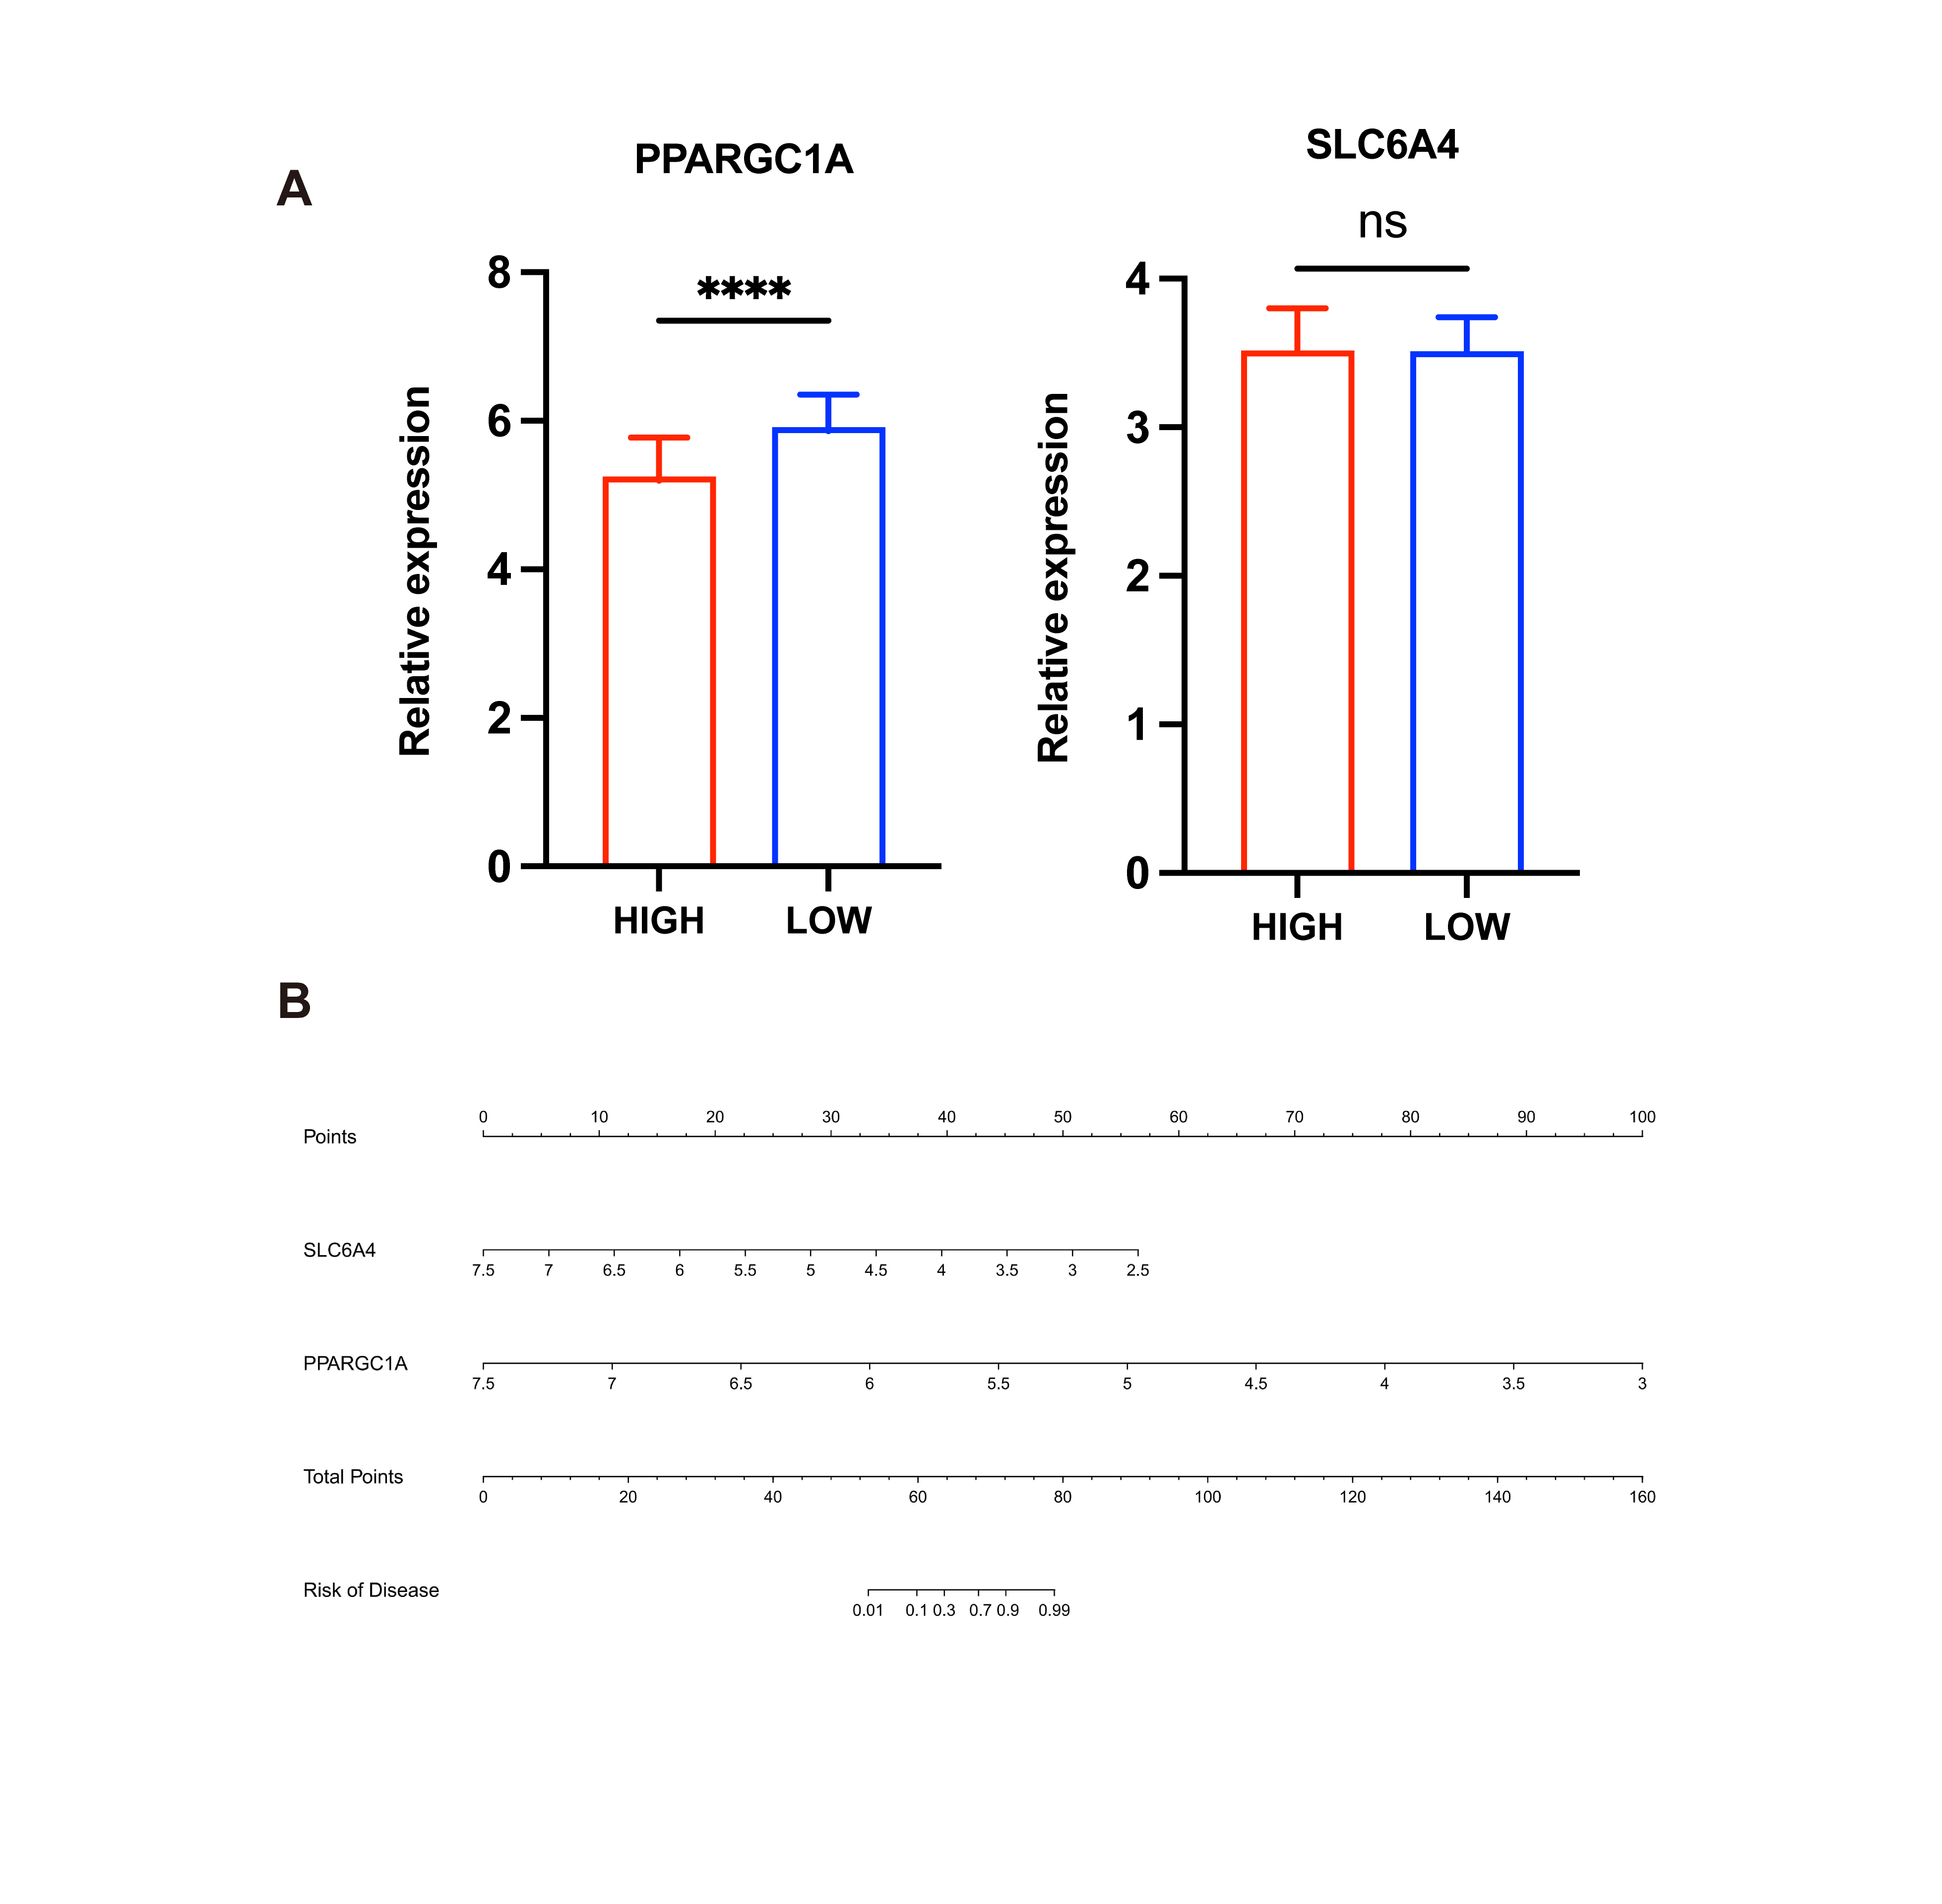
**

**Figure S1. The relationship between the expression levels of these two key genes and clinical indicators, as well as their diagnostic relevance**

(A) The Mayo scores corresponding to different expression levels of *PPARGC1A* and *SLC6A4*.

(B) Nomogram for predicting UC risk based on signature genes.

The data were presented as the mean ± SD, with significance indicated by ****p<0.0001, and ns, not significant.


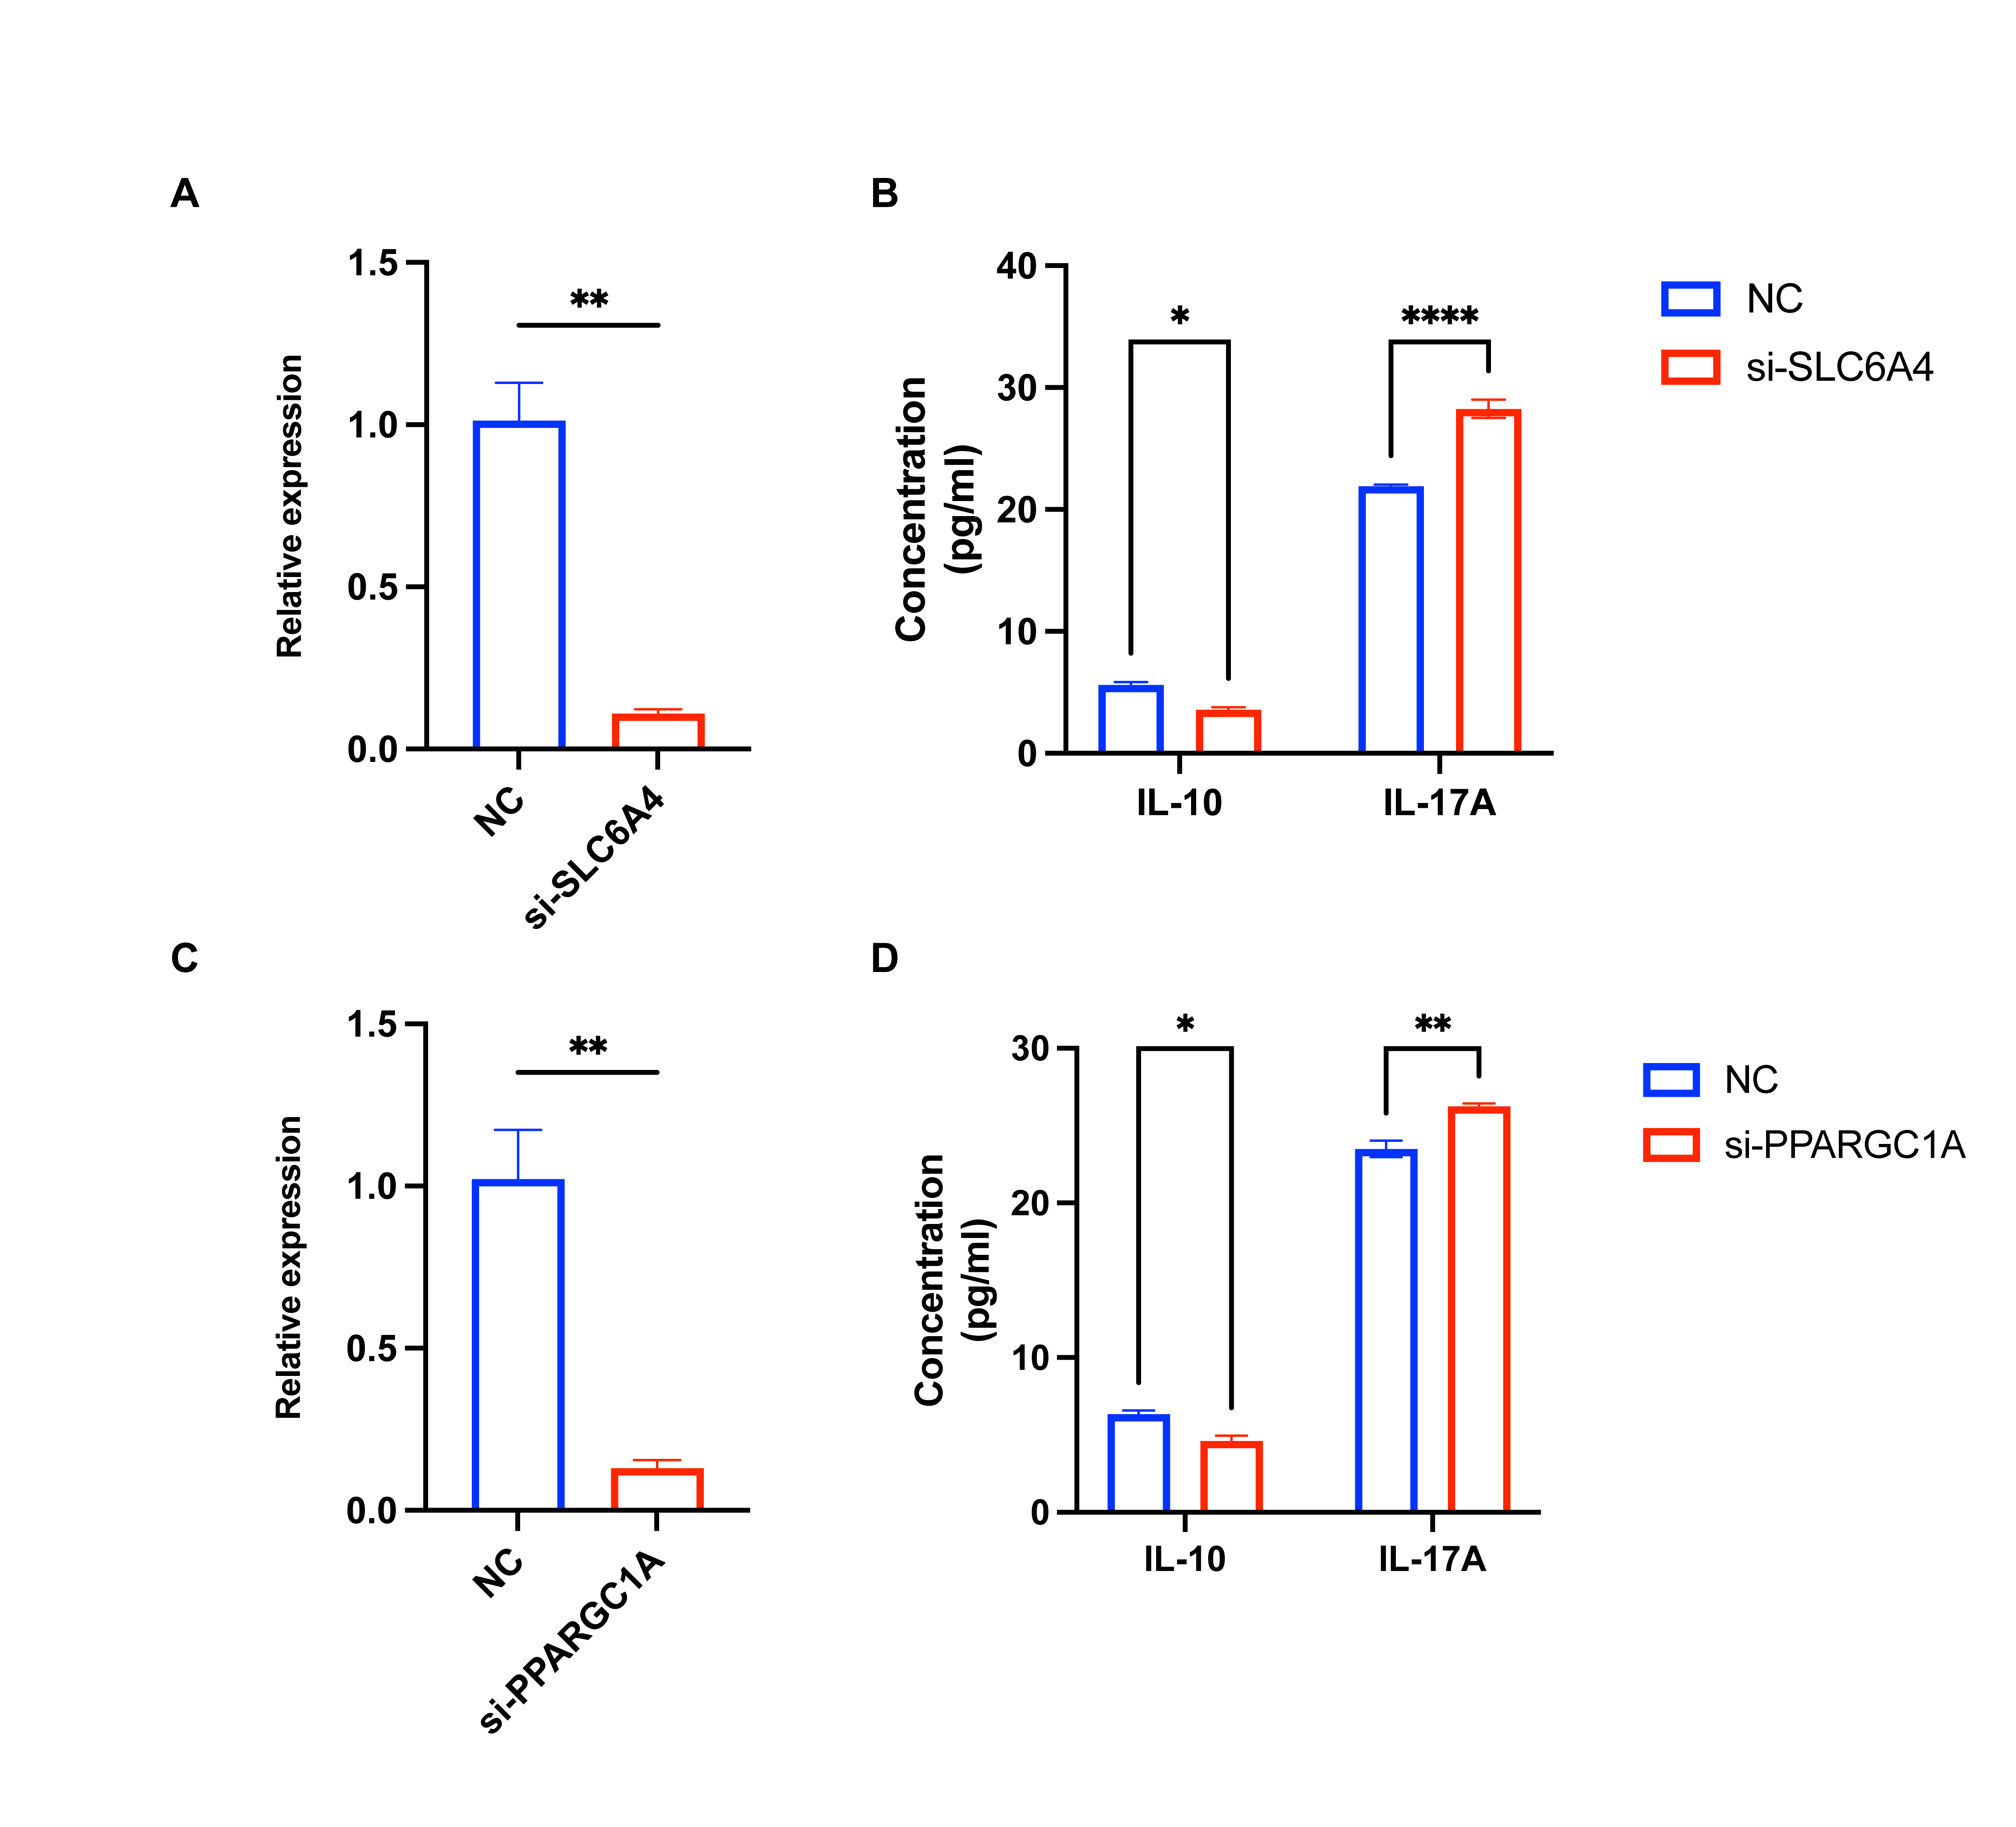


**Figure S2. siRNA transfection in activated CD4⁺ T cells reduced *PPARGC1A* and *SLC6A4* expression and affected the differentiation.**

(A&C) qPCR was used to detect the expression level of *PPARGC1A* and *SLC6A4*.

(B&D) IL-10 and IL-17A level variations after transfection.

The data were presented as the mean ± SEM, with significance indicated by *p<0.05, **p < 0.01, ****p<0.0001.
